# Supplementary material for: Reusable magnetic graphene oxide based anion exchanger for the separation and removal of anionic dyes
Source: Royal Society of Chemistry journal article supplement (doi:10.1039/d3nj04557a), 2023-12-04
Supplement: d3nj04557a1.pdf [file d3nj04557a1.pdf]

## Electronic Supplementary Information

### Reusable Magnetic Graphene Oxide based Anion Exchanger for the Separation and Removal of Anionic Dyes

Poonam Kumari, <sup>a,b</sup> Disha, <sup>a,b</sup> Raj Rani, <sup>a,b</sup> Manoj K. Patel, <sup>b,c</sup> Sunita Mishra, <sup>a,b</sup> Sandeep Singhai, <sup>b,d</sup>  
Manoj K. Nayak, <sup>a,b\*</sup>

<sup>a</sup> Materials Science and Sensor applications, *CSIR-Central Scientific Instruments Organisation (CSIR-CSIO), Sector 30-C, Chandigarh- 160030, India.*

<sup>b</sup> *Academy of Scientific and Innovative Research (AcSIR), Ghaziabad, Uttar Pradesh- 201 002, India.*

<sup>c</sup> *Manufacturing Science and Instrumentation, CSIR-Central Scientific Instruments Organisation. Sector 30-C, Chandigarh-160030, India.*

<sup>d</sup> *Centre for Advanced Radiation Shielding and Geopolymeric Materials, CSIR-Advanced Materials and Processes Research Institute, Bhopal- 462026, India.*

*\*Corresponding author E-mail: mknayak@csio.res.in*

**Table S1.** Elemental composition analysis of GO, MGO, NGO, and NMGO using high resolution XPS spectra.

| Chemical states | Atomic Concentration (%) |       |       |       |
|-----------------|--------------------------|-------|-------|-------|
|                 | GO                       | MGO   | NGO   | NMGO  |
| C 1s            | 67.98                    | 36.03 | 71.01 | 36.18 |
| O 1s            | 32.02                    | 44.36 | 26.65 | 42.72 |
| Fe 2p           | -                        | 19.62 | -     | 18.88 |
| N 1s            | -                        | -     | 3.47  | 2.22  |

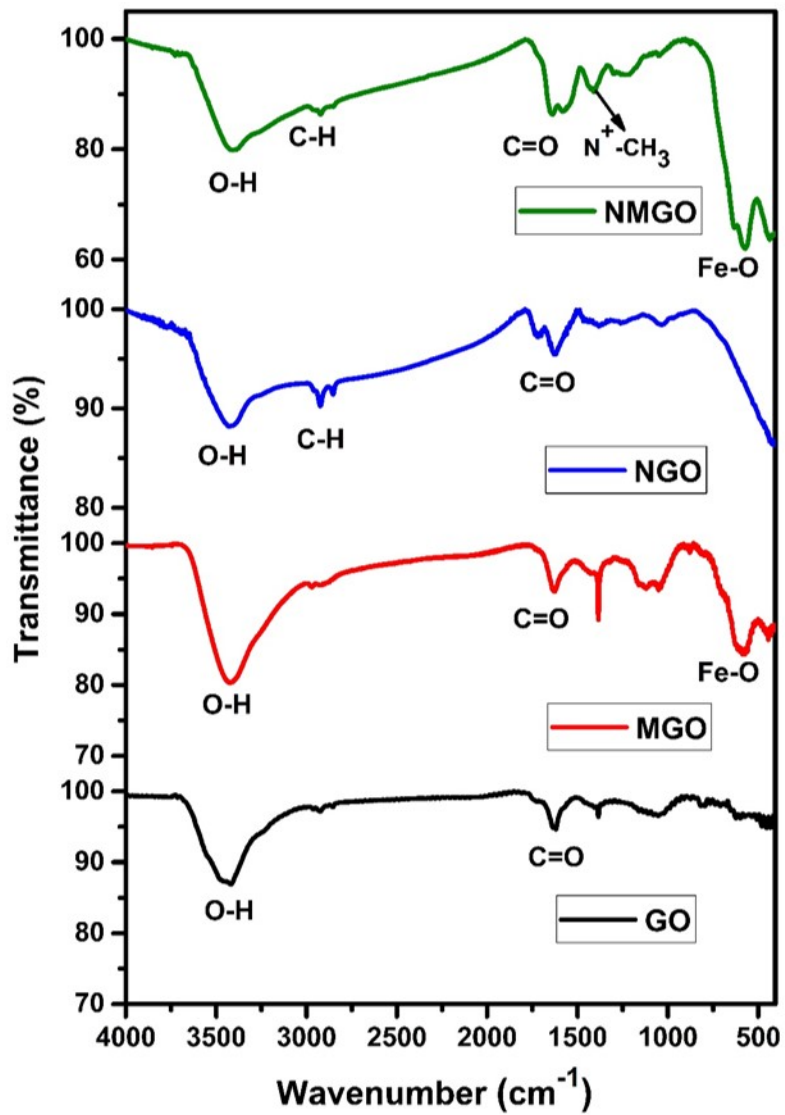

Fig. S1. FTIR spectra for GO, MGO, NGO, and NMGO

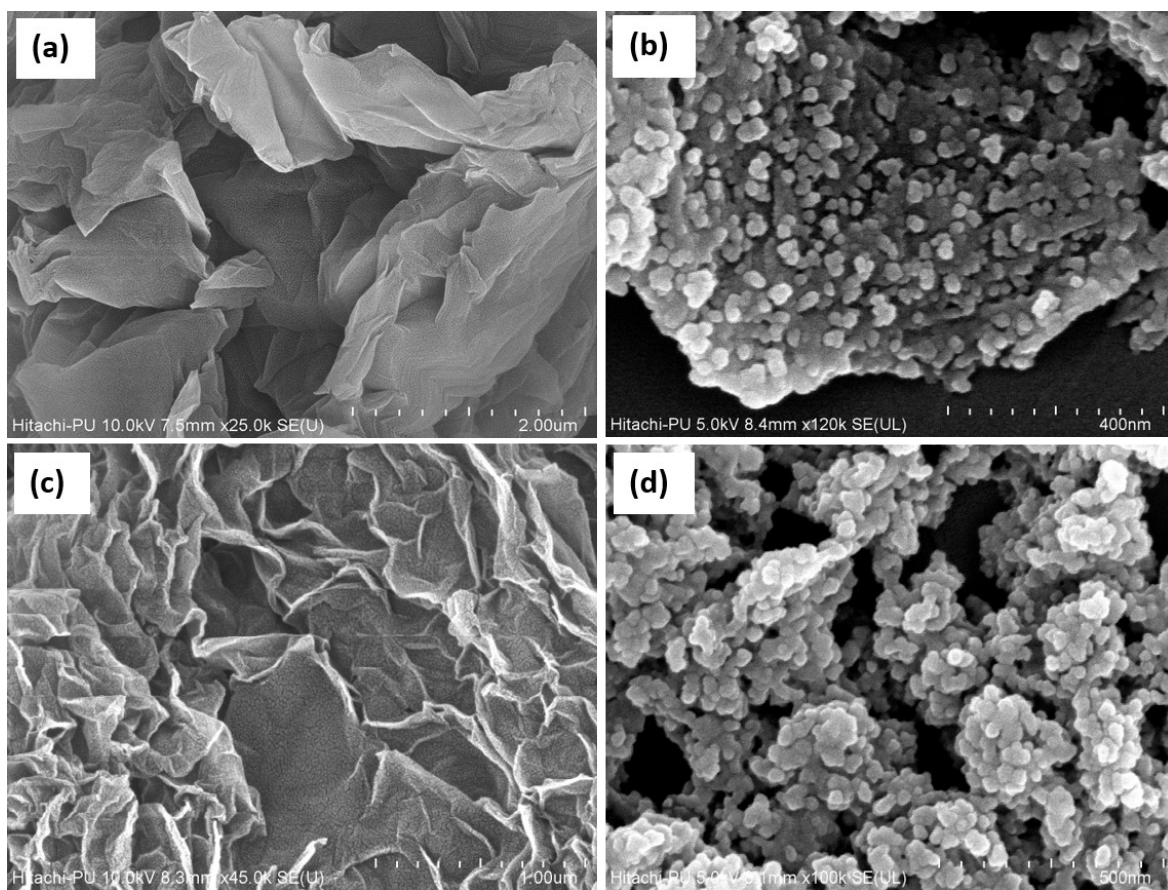

**Fig. S2.** FESEM images for (a) GO, (b) MGO, (c) NGO, and (d) NMGO.

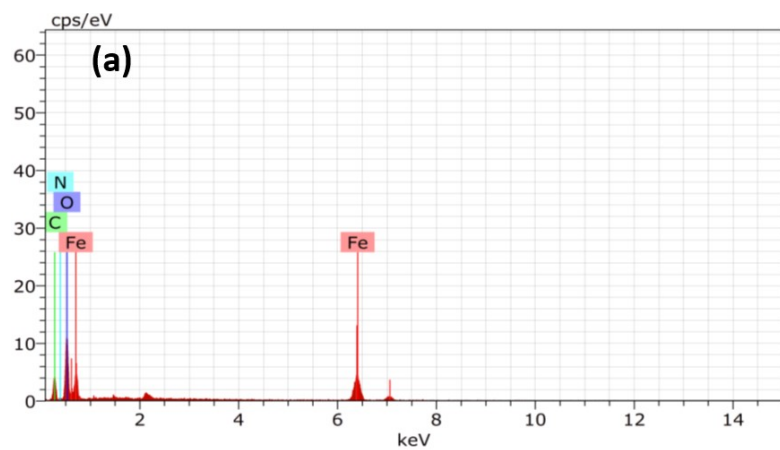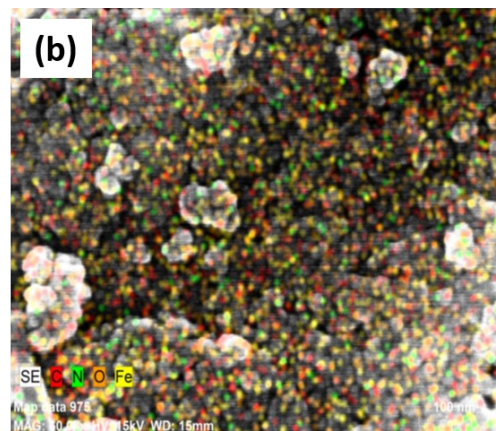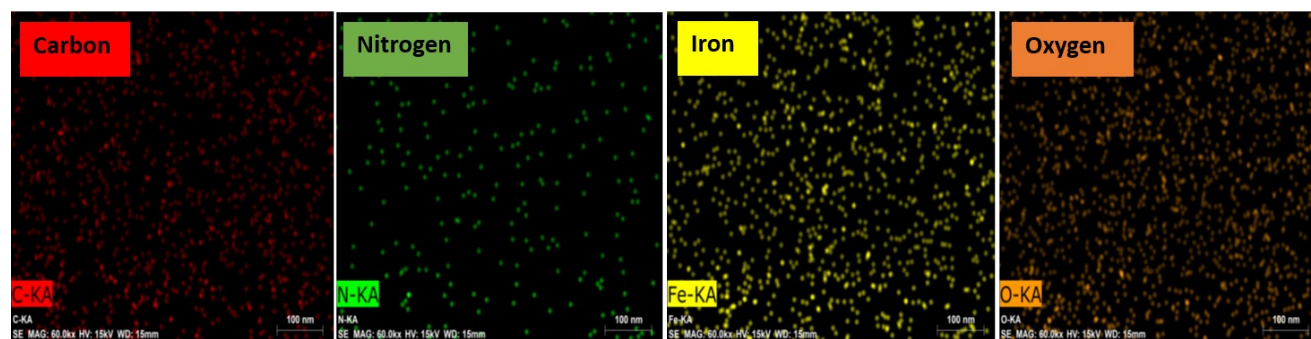

Fig. S3. EDS and elemental mapping of NMGO.

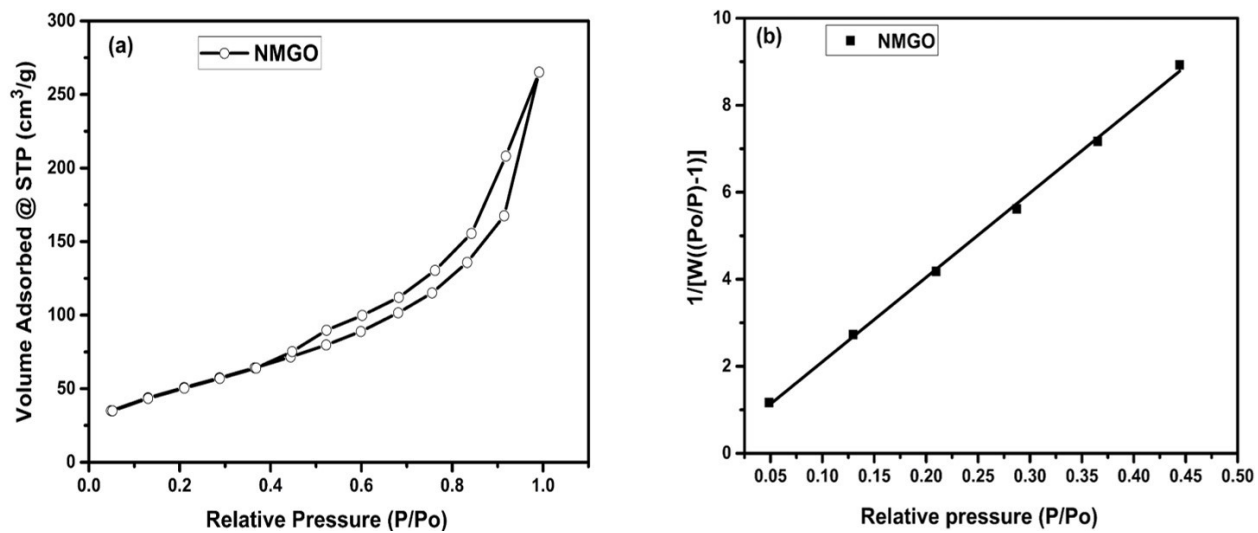

**Fig. S4.** (a) Brunauer-Emmett-Teller (BET) Nitrogen (N<sub>2</sub>) adsorption-desorption isotherms of NMGO and (b) The fitting curve of the BET surface area of NMGO.

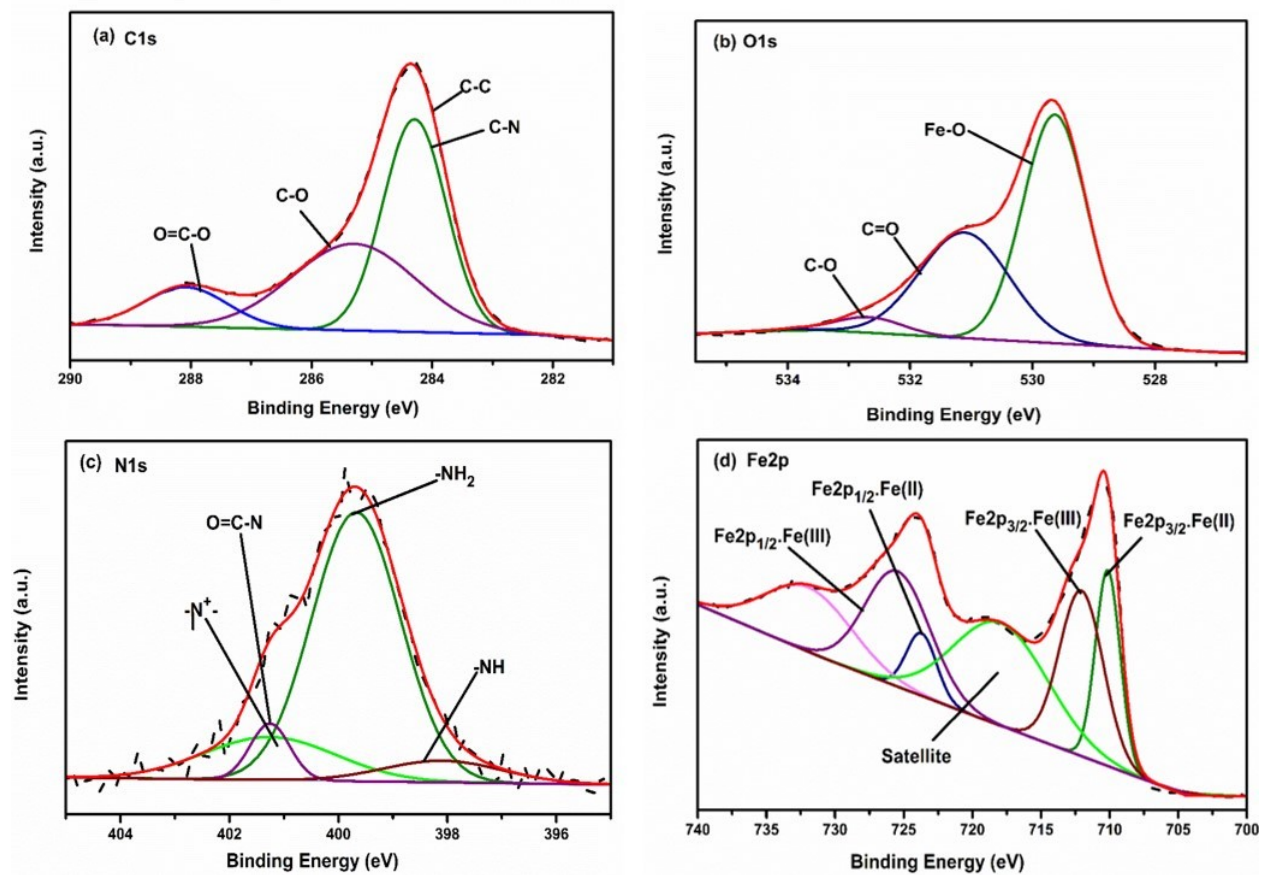

**Fig. S5.** High resolution XPS spectra of (a) C1s, (b) O1s, (c) N1s, and (d) Fe2p of NMGO.

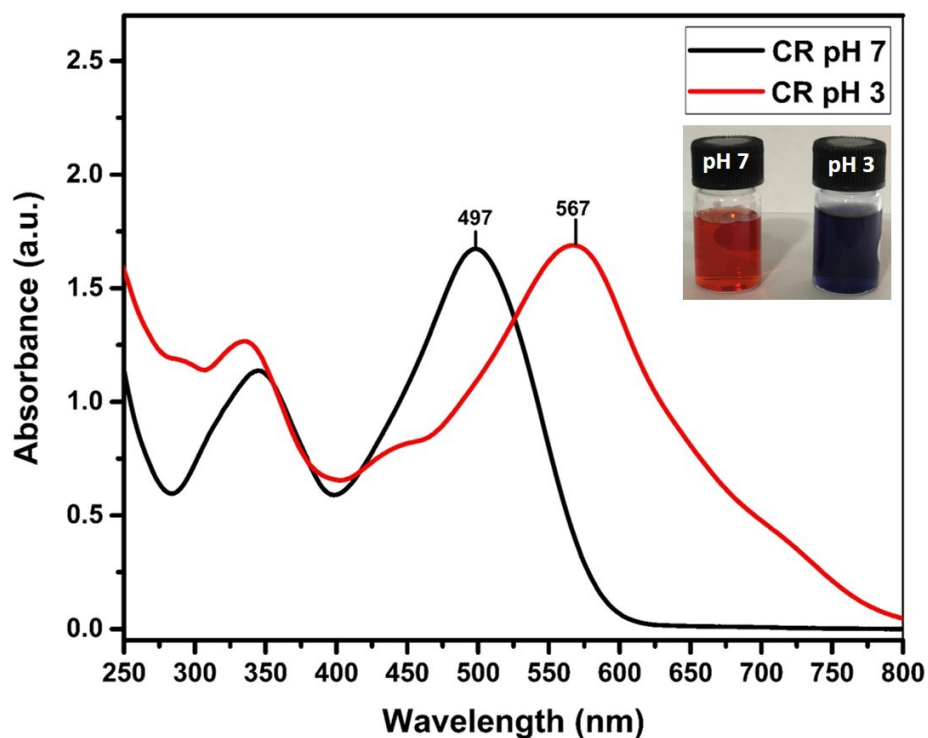

**Fig. S6.** UV-Vis spectra of Congo red at pH 7 and pH 3 with maximum absorption at 497 and 567 nm.

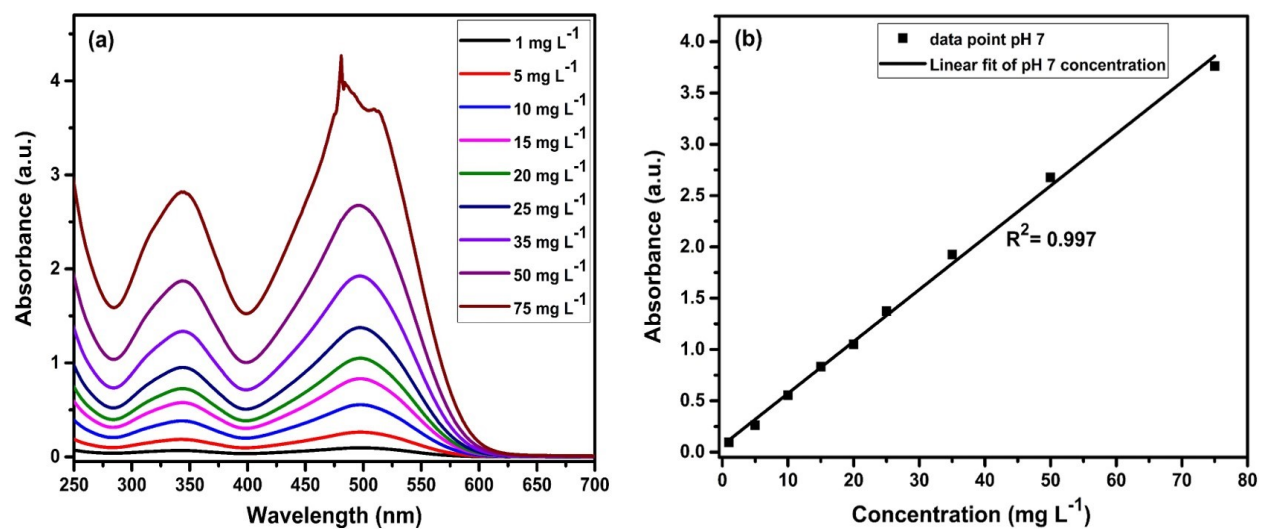

**Fig. S7.** (a) The UV-Vis spectra of the Congo red in an aqueous solution at different concentrations at pH 7 with a maximum absorption of 497 nm at rt. (b) Calibration curve of different concentrations at pH 7 for the Congo red.



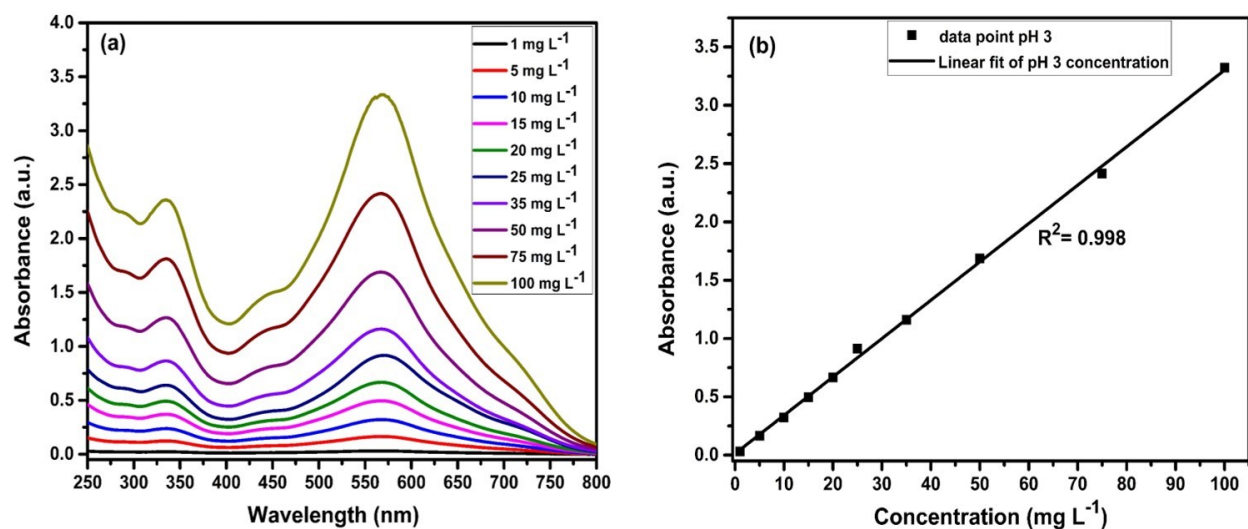

**Fig. S8.** (a) The UV-Vis spectra of Congo red in an aqueous solution at different concentrations at pH 3 with a maximum absorption of 567 nm at rt. and (b) Calibration curve of different concentrations at pH 3 for the Congo red.

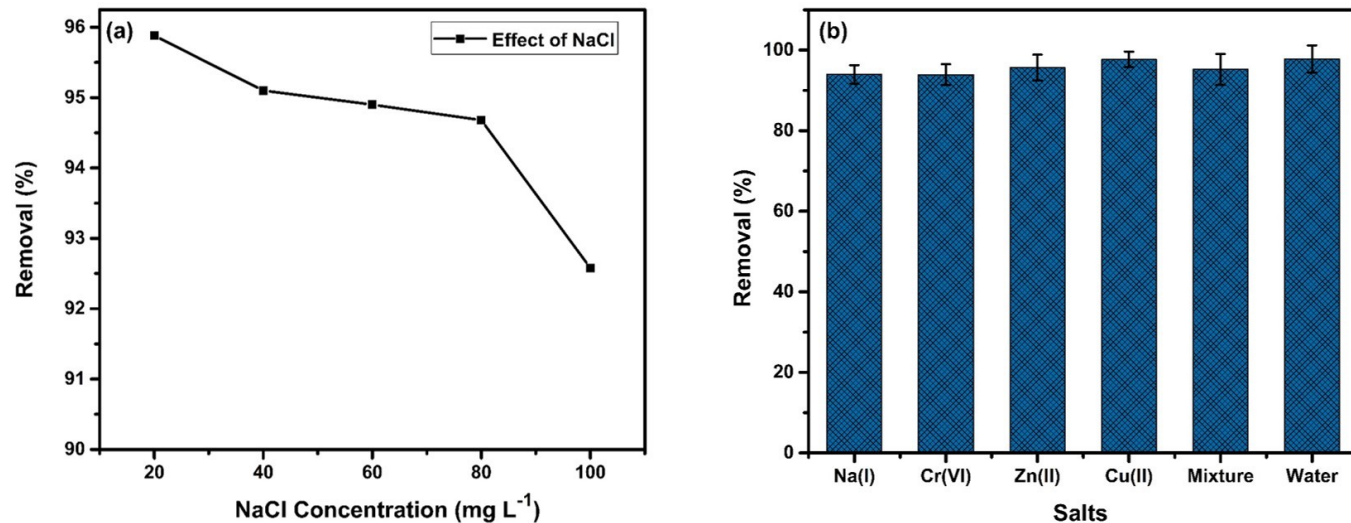

**Fig. S9.** (a) Effect of NaCl concentration on adsorption of Congo red onto NMGO (dye concentration 50 mg L<sup>-1</sup>) (b) Effect of different metal salts on the adsorption of Congo red onto NMGO.

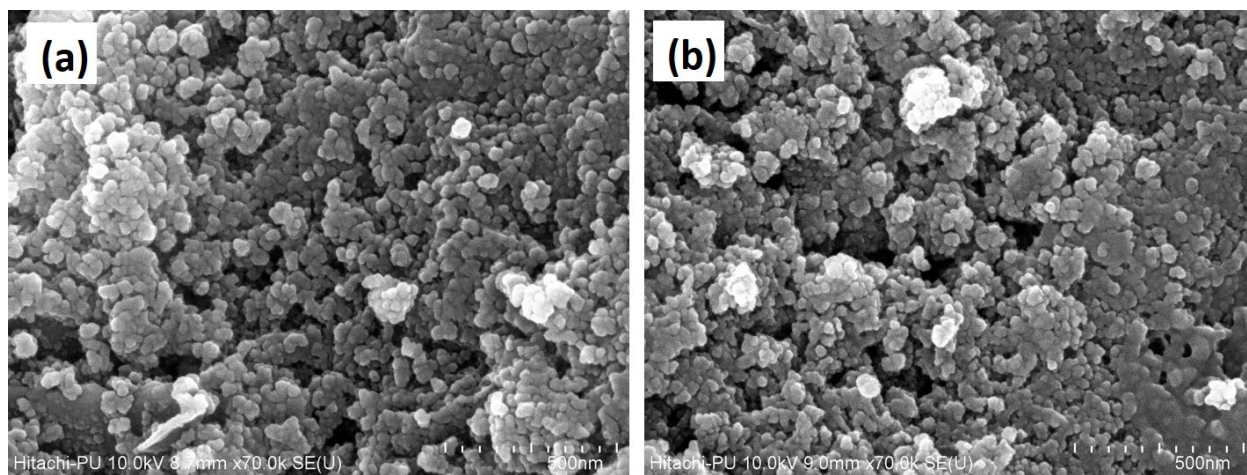

**Fig. S10.** FESEM images of (a) NMGO before and (b) after adsorption of Congo red.

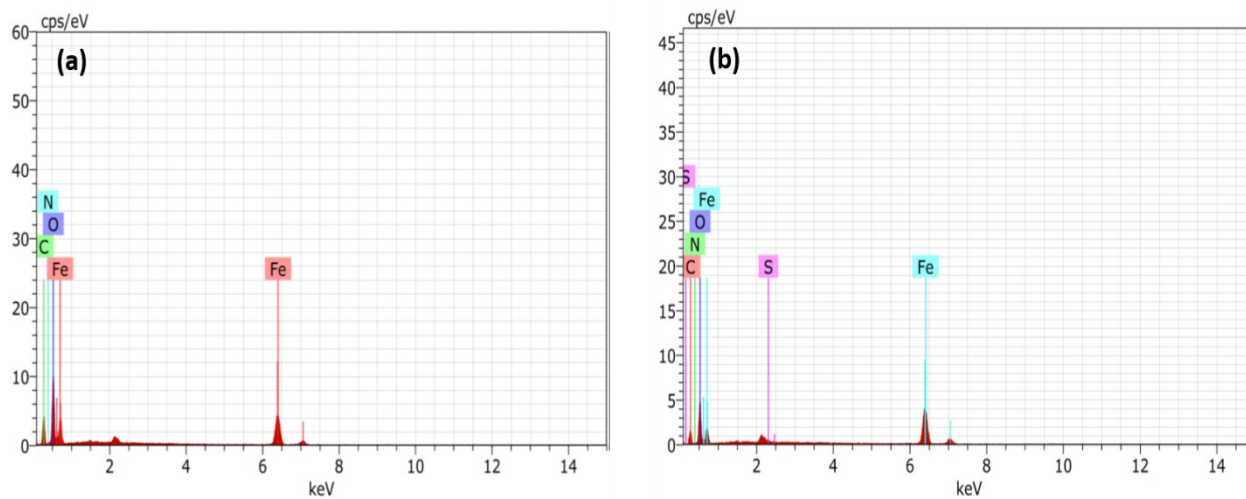

**Fig. S11.** EDS images of (a) NMGO before and (b) after adsorption of Congo red.

**Table S2.** EDS analysis of NMGO before and after adsorption of Congo red.

| <b>Atom (%)</b> | <b>NMGO</b> | <b>NMGO-CR</b> |
|-----------------|-------------|----------------|
| Carbon          | 36.75       | 37.28          |
| Oxygen          | 32.67       | 31.88          |
| Iron            | 24.39       | 29.24          |
| Nitrogen        | 1.67        | 1.40           |
| Sulfur          | -           | 0.21           |

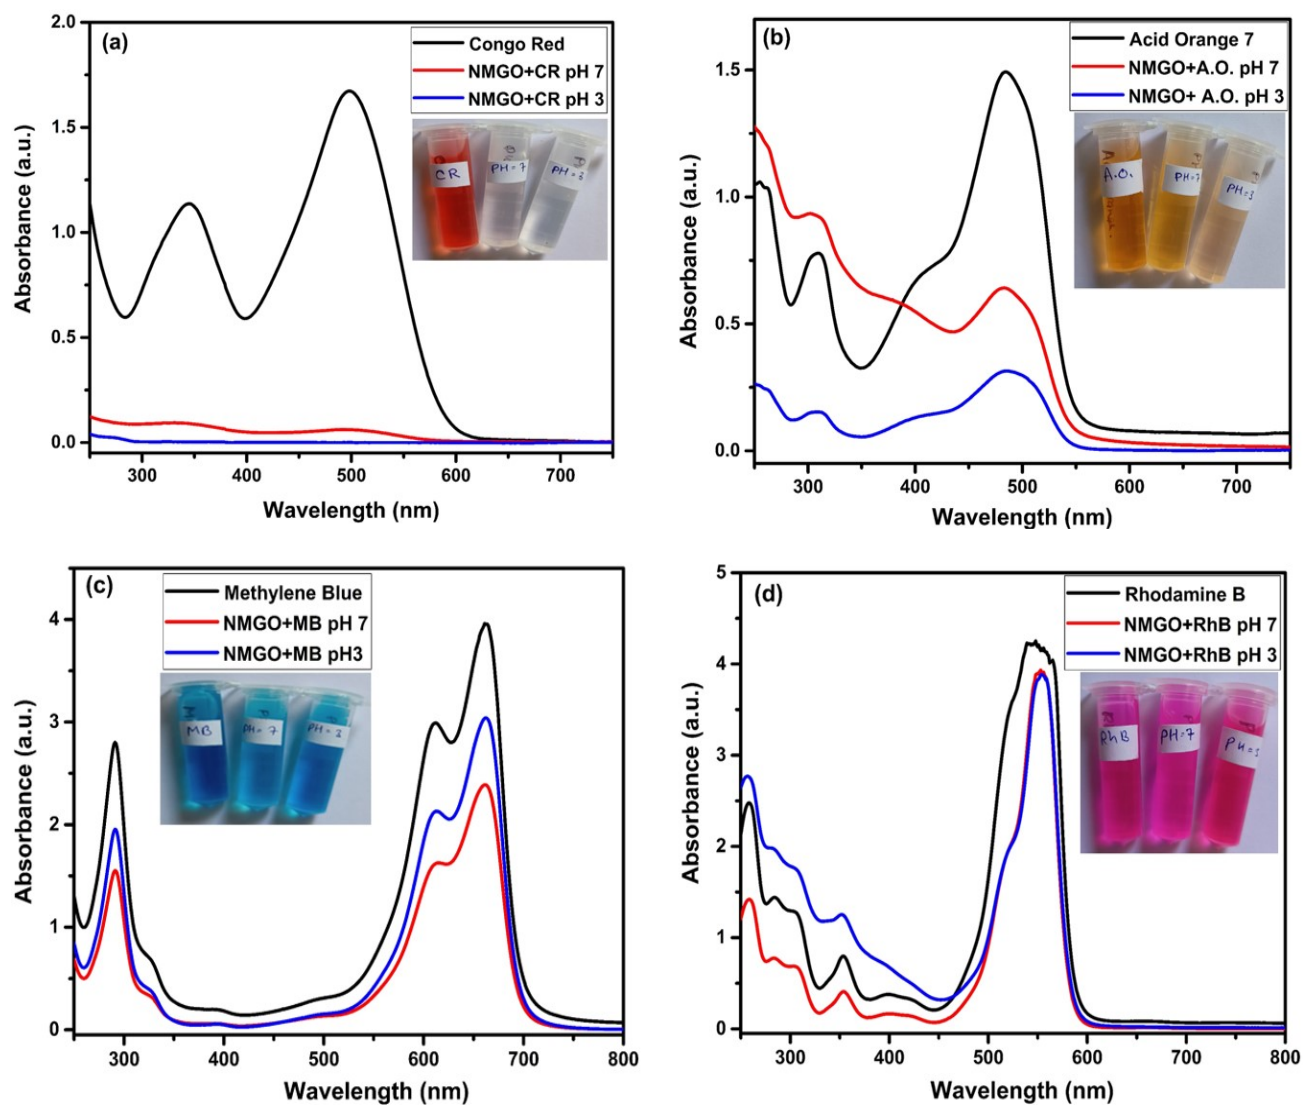

**Fig. S12.** Dye selectivity study with the NMGO using (a) Congo red, (b) Orange acid 7, (c) Methylene blue, and (d) Rhodamine B at neutral and acidic pH (@dye concentration- 25 mg L<sup>-1</sup>; adsorbent dosages- 2 mg/10 mL; contact time- 150 min.)

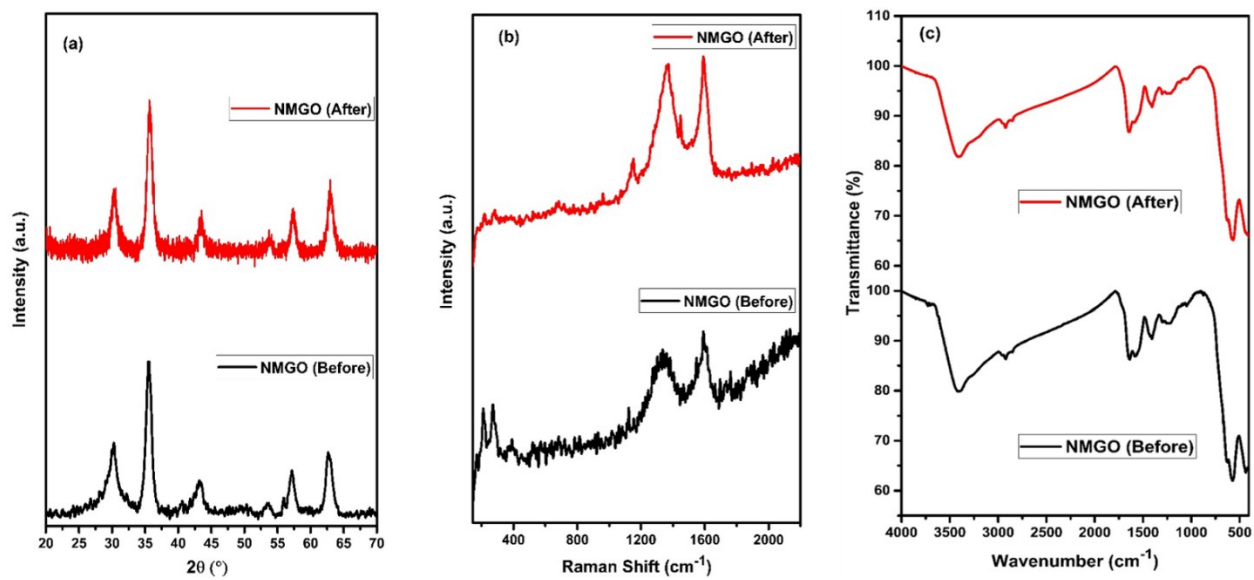

**Fig. S13.** (a) XRD, (b) Raman, and (c) FTIR of NMGO prior to the adsorption of Congo red and its subsequent regeneration.
